# Supplementary material for: Co-doping regulation on Ni-based electrocatalysts to adjust the selectivity of oxygen reduction reaction for Zn–air batteries and H2O2 production
Source: Royal Society of Chemistry journal article supplement (doi:10.1039/d4dt01625d), 2024-01-01
Supplement: d4dt01625d1.pdf [file d4dt01625d1.pdf]

## Electronic Supplementary Information (ESI)

### **Co-doping regulation on Ni-based electrocatalyst to adjust the selectivity of oxygen reduction reaction for Zn-air battery and H<sub>2</sub>O<sub>2</sub> production**

Songhan Hu<sup>a, b</sup>, Kai Wang<sup>a\*</sup>, Xinxin Xu<sup>c</sup>, Qiang Wang<sup>a\*</sup>

<sup>a</sup> Key Laboratory of Electromagnetic Processing of Materials (Ministry of Education), Northeastern University, Shenyang 110819, China

<sup>b</sup> School of Materials Science and Engineering, Northeastern University, Shenyang 110819, China

<sup>c</sup> Department of Chemistry, College of Science, Northeastern University, Shenyang 110819, Liaoning, China

## Materials and characterization

All chemicals were of analytical grade, commercially available from Sinopharm Chemical Reagent Co. Ltd and used as received without further purification. XRD pattern was recorded on X-ray diffractometer with  $\text{CuK}\alpha$  ( $\lambda = 1.5418 \text{ \AA}$ ) radiation (Philips X'Pert Pro Super, Philips). Raman spectroscopy was conducted with an excitation wavelength of 633 nm (LabRAMHR-800, HORIBA). XPS was performed on photoelectron spectroscopy (ESCALAB 250Xi, Thermo Fisher Scientific). The morphology was observed on an ultra plus field emission scanning electron microscope (SEM, ultra plus, ZEISS) and Spherical aberration corrected transmission electron microscope (ACTEM, JEOL, EM-ARM200F). Electrochemical experiments were conducted on electrochemical workstation (CHI-760E, Chenhua). UV-Vis spectrophotometer (T6 new century, Persee) was used to study the concentration of  $\text{H}_2\text{O}_2$ .

## Single-crystal X-ray diffraction

Single crystal of **NiMOF** was selected under an optical microscope and glued on a glass fiber. Structural measurement was performed with a Bruker AXS SMART APEX II CCD diffractometer at 293 K. The structure was solved with direct method and refined by the full-matrix least-squares method on  $F^2$  with the Olex2 crystallographic software package. Anisotropic thermal parameters were used to refine all non-hydrogen atoms. Carbon-bound hydrogen atoms were placed in geometrically calculated positions. CIF file (CCDC 2350292) contains supplementary crystallographic data for this paper. The file can be obtained free of charge via [www.ccdc.cam.ac.uk/data\\_request/cif](http://www.ccdc.cam.ac.uk/data_request/cif) (Cambridge Crystallographic Data Centre).

## The synthesis of NCNT

Zinc nitrate (0.6 g) and 2-methylimidazole (1.3 g) were dissolved in methanol (10.0 ml) with the separated glass jar. Then, the zinc nitrate solution was rapidly poured into the 2-methylimidazole solution under constant stirring at 25 °C. The mixed solution was stirred for 15 min and kept the solution at tranquility condition for 24 h. The final products were collected by centrifuging rinsed with excess methanol, and dried in an oven at 80 °C for 12 h. Then ZIF-8 was obtained. ZIF-8 (0.2 g, at gas outlet side) and DCDA (2.2 g, at gas inlet side) were placed on both sides of a porcelain boat. After heating in the presence of  $\text{N}_2$  atmosphere in tube furnace at 800 °C for 3 h, NCNT was obtained.

## The synthesis of Co/NCNTs

The ZIF-67 was synthesized by mixing cobalt chloride (0.125g) and 2-methylimidazole (0.33g) in 10 ml methanol under stirring for 12 h. After filtering precipitates and washing products with methanol for many times, the products were dried at 80 °C overnight to obtain ZIF-67 powder. ZIF-67 (0.2 g, at gas outlet side) and DCDA (2.2 g, at gas inlet side) were placed on both sides of a porcelain boat. After heating in the presence of  $\text{N}_2$  atmosphere in tube furnace at 800 °C for 3 h, Co/NCNTs was obtained.

## RRDE test in ORR

RRDE (electrode area is  $0.2475 \text{ cm}^2$ ) experiment was also conducted in  $\text{O}_2$  saturated KOH (0.1 M). Working electrode was fabricated as follows: the mixture of **NiO@NCNTs**(or **Co/NiO@NCNTs**, 10 mg) was dispersed in aqueous solution of N,N-Dimethylformamide (0.9 mL) and Nafion (100  $\mu\text{L}$ , 5 %). The ink (3  $\mu\text{L}$ ) was dropped on RRDE and served as working electrode. Pt wire and Ag/AgCl electrode (3 M KCl) were employed as counter and reference electrodes. The disk potential was cycled from 0 to 1.0 V (vs. RHE) with a scan rate of  $10 \text{ mV}\cdot\text{s}^{-1}$ . The ring potential was constant at 1.2 V (vs. RHE). The  $\text{H}_2\text{O}_2$  selectivity and electron transfer number (n) were calculated with Eq. 1 and 2. In these equations, ID and IR represent the disk and ring currents density. N ( $N = 0.37$ , obtained from  $\text{K}_3\text{Fe}(\text{CN})_6$  reduction experiments at various rotation rates) is

the current collection efficiency of the Pt ring<sup>1</sup>.

$$\text{H}_2\text{O}_2 \% = (200 \times \text{IR}/\text{N}) / (\text{IR}/\text{N} + \text{ID}) \quad (1)$$

$$n = 4 \times \text{Id} / (\text{IR}/\text{N} + \text{ID}) \quad (2)$$

## RDE test in ORR

The ink was obtained as above mentioned and cast on rotating disk electrode (RDE). The RDE served as working electrode. Carbon rod and Ag/AgCl electrode were used as counter and reference electrodes. ORR was performed in 0.1 M KOH. In ORR, linear sweep voltammetry (LSV) curves were recorded at 10 mV·s<sup>-1</sup>. The rotating speed of RDE was 400, 625, 900, 1225 and 1600 rpm. The electron transfer number (n) can also be calculated by the Koutecky-Levich (K-L) method (3-5)<sup>2</sup>:

$$1/J_{\text{disk}} = 1/J_k + 1/J_l \quad (3)$$

$$J_l = 0.62 \times n \times F \times D^{2/3} \times \nu^{-1/6} \times C^* \times \omega^{1/2} \quad (4)$$

$$1/J_{\text{disk}} = 1/J_k + 1/0.62 \times n \times F \times D^{2/3} \times \nu^{-1/6} \times C^* \times \omega^{1/2} \quad (5)$$

where  $J_{\text{disk}}$  represents disk current density,  $J_k$  and  $J_l$  are the kinetic and diffusion limiting current density, respectively,  $F$  is the faraday constant,  $D$  is the diffusion coefficient of O<sub>2</sub>,  $\nu$  is the kinematic viscosity of electrolyte,  $C^*$  is the concentration of O<sub>2</sub> in the bulk electrolyte, and  $\omega$  is the angular velocity (rad/s) of disk electrode. Therefore,  $n$  can be derived from the slope of the linear graph of  $1/J_{\text{disk}}$  and  $\omega^{-1/2}$ .

## H<sub>2</sub>O<sub>2</sub> concentration measurement and stability test

The H<sub>2</sub>O<sub>2</sub> production was carried out in a homemade two-room cell electrolyzer with a three-electrode configuration. First, 200 μL of the as-prepared ink was uniformly deposited on the carbon paper of 1 cm × 1 cm and dried in the air. Then the carbon cloth with a mass load of 0.1 mg was used as the working electrode, the carbon rod as the counter electrode, and Ag/AgCl as the reference electrode, to perform the electrosynthesis of H<sub>2</sub>O<sub>2</sub> in a self-made H-type electrolytic cell. A Nafion 117 membrane was adopted to separate the cathode and anode chambers. The production rate of H<sub>2</sub>O<sub>2</sub> was quantified by the titration of cerium sulfate with Eq. 6<sup>3</sup>.

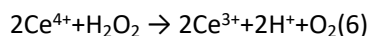

## Zn-air battery assemble

The hybrid battery was assembled with a home-made cell in the size 4.2 × 4 × 4 cm<sup>3</sup>. In this battery, the Zn plate acts as anode with working area 3.2 cm<sup>2</sup>. The ink of Co/NiO@NCNTs was cast on carbon paper at first. Its other side was covered by PTFE and used as air diffusion layer. After covered by PTFE, the carbon paper with Co/NiO@NCNTs loaded on was employed as cathode. The working area of air cathode is also 3.2 cm<sup>2</sup>. In this hybrid battery, mixture solution of KOH (6.0 M) and Zn(OAc)<sub>2</sub>·2H<sub>2</sub>O (20 mM) was used as electrolyte. In measurement, no additional oxygen was inlet into this battery. The specific capacitance of battery was calculated based on Eq. 7. In this equation,  $I$  and  $t$  are current density and discharge time.  $\Delta m_{\text{Zn}}$  represents the mass of Zn consumed<sup>4</sup>.

$$C = It / \Delta m_{\text{Zn}} \quad (7)$$

## Calculation methods

All the computational analysis was performed employing the Gaussian 09 program package. The unrestricted hybrid density functional method UB3LYP was used in the density function theory (DFT) calculation. The adsorption energy was calculated using Eq. 8<sup>5</sup>.

$$\Delta G = \Delta E + \text{ZPE} - T\Delta S \quad (8)$$

Table. S1 Crystallographic data for NiMOF.

|                                                                                                                                    |                                                                   |
|------------------------------------------------------------------------------------------------------------------------------------|-------------------------------------------------------------------|
| <b>Complex</b>                                                                                                                     | NiMOF                                                             |
| <b>Empirical formula</b>                                                                                                           | C <sub>9</sub> H <sub>11</sub> N <sub>2</sub> NiO <sub>7.50</sub> |
| <b>Formula weight</b>                                                                                                              | 325.91                                                            |
| <b>Crystal system</b>                                                                                                              | Monoclinic                                                        |
| <b>Space group</b>                                                                                                                 | <i>I</i> 2/ <i>a</i>                                              |
| <b><i>a</i> (Å)</b>                                                                                                                | 19.1436(9)                                                        |
| <b><i>b</i> (Å)</b>                                                                                                                | 9.0562(3)                                                         |
| <b><i>c</i> (Å)</b>                                                                                                                | 12.8706(5)                                                        |
| <b><math>\alpha</math> (°)</b>                                                                                                     | 90                                                                |
| <b><math>\beta</math> (°)</b>                                                                                                      | 93.528 (4)                                                        |
| <b><math>\gamma</math> (°)</b>                                                                                                     | 90                                                                |
| <b><i>V</i> (Å<sup>3</sup>)</b>                                                                                                    | 2227.12(15)                                                       |
| <b><i>Z</i></b>                                                                                                                    | 8                                                                 |
| <b><i>D<sub>c</sub></i> (g cm<sup>-3</sup>)</b>                                                                                    | 1.944                                                             |
| <b><math>\mu</math> (mm<sup>-1</sup>)</b>                                                                                          | 1.783                                                             |
| <b><i>F</i> (000)</b>                                                                                                              | 1336                                                              |
| <b>Reflections collected</b>                                                                                                       | 5561                                                              |
| <b>Unique reflections</b>                                                                                                          | 2603                                                              |
| <b>parameters</b>                                                                                                                  | 185                                                               |
| <b><i>R</i><sub>int</sub></b>                                                                                                      | 0.064                                                             |
| <b>GOF</b>                                                                                                                         | 1.085                                                             |
| <b><i>R</i><sub>1</sub><sup>a</sup> [<i>I</i>&gt;2<math>\sigma</math>(<i>I</i>)]</b>                                               | 0.0240                                                            |
| <b><i>wR</i><sub>2</sub><sup>b</sup> (all data)</b>                                                                                | 0.0582                                                            |
| <sup>a</sup> $R_1 = \sum   F_o  -  F_c   / \sum  F_o $ , <sup>b</sup> $wR_2 = \sum [w(F_o^2 - F_c^2)^2] / \sum [w(F_o^2)^2]^{1/2}$ |                                                                   |

**Table. S2** Selected bond distances (Å) and angles (°) for **NiMOF**.

| <b>NiMOF</b>                                                                  |            |                       |            |
|-------------------------------------------------------------------------------|------------|-----------------------|------------|
| Ni(1)-O(16)#1                                                                 | 2.1005(12) | Ni(1)-O(17)           | 2.0934(12) |
| Ni(1)-O(13)                                                                   | 2.0298(11) | Ni(1)-O(18)           | 2.0497(11) |
| Ni(1)-O(15)#1                                                                 | 2.1503(12) | Ni(1)-N(5)#2          | 2.0477(14) |
| Ni(1)-C(14)#1                                                                 | 2.4595(16) | O(16)#1-Ni(1)-O(15)#1 | 61.96(4)   |
| O(16)#1-Ni(1)-C(14)#1                                                         | 31.09(5)   | O(13)-Ni(1)-O(16)#1   | 160.90(5)  |
| O(13)-Ni(1)-O(15)#1                                                           | 98.98(5)   | O(13)-Ni(1)-O(17)     | 92.08(5)   |
| O(13)-Ni(1)-O(18)                                                             | 90.49(5)   | O(13)-Ni(1)-N(5)#2    | 99.20(5)   |
| O(13)-Ni(1)-C(14)#1                                                           | 129.82(5)  | O(15)#1-Ni(1)-C(14)#1 | 30.86(5)   |
| O(17)-Ni(1)-O(16)#1                                                           | 86.40(5)   | O(17)-Ni(1)-O(15)#1   | 87.88(4)   |
| O(17)-Ni(1)-C(14)#1                                                           | 86.28(5)   | O(18)-Ni(1)-O(16)#1   | 89.11(5)   |
| O(18)-Ni(1)-O(15)#1                                                           | 85.50(5)   | O(18)-Ni(1)-O(17)     | 173.20(5)  |
| O(18)-Ni(1)-C(14)#1                                                           | 87.24(5)   | N(5)#2-Ni(1)-O(16)#1  | 99.88(5)   |
| N(5)#2-Ni(1)-O(15)#1                                                          | 161.81(5)  | N(5)#2-Ni(1)-O(17)    | 92.00(5)   |
| N(5)#2-Ni(1)-O(18)                                                            | 93.80(5)   | N(5)#2-Ni(1)-C(14)#1  | 130.97(6)  |
| Symmetry code for <b>NiMOF</b> : #1 -x+1,y+1/2,-z+3/2 #2 -x+1/2,-y+3/2,-z+3/2 |            |                       |            |

**Table S3.** Compare H<sub>2</sub>O<sub>2</sub> production ability of NiO@NCNTs with other 2e-ORR electrocatalysts.

| Electrocatalysts                                                           | Electrolyte | H <sub>2</sub> O <sub>2</sub> Selectivity<br>(%@V vs. RHE) | Production rate                                           | Refs      |
|----------------------------------------------------------------------------|-------------|------------------------------------------------------------|-----------------------------------------------------------|-----------|
| NiO@NCNTs                                                                  | 0.1 M KOH   | 90.5~ 95.2%@0.46                                           | 500 mmol g <sup>-1</sup> h <sup>-1</sup>                  | This work |
| ZnO                                                                        | 0.1 M KOH   | 90.4@0.4                                                   | 211.94 mmol g <sup>-1</sup> h <sup>-1</sup>               | [6]       |
| NiO                                                                        | 0.1 M KOH   | 79.4@0.4                                                   | 167.47 mmol g <sup>-1</sup> h <sup>-1</sup>               | [6]       |
| h-WO <sub>3</sub>                                                          | 0.1 M KOH   | 71@0.4                                                     | 128 mmol g <sup>-1</sup> h <sup>-1</sup>                  | [7]       |
| γ-WO <sub>3</sub>                                                          | 0.1 M KOH   | 78@0.4                                                     | 145 mmol g <sup>-1</sup> h <sup>-1</sup>                  | [7]       |
| oxo-G/H <sub>2</sub> O <sub>2</sub> /<br>NH <sub>3</sub> ·H <sub>2</sub> O | 0.1 M KOH   | 82@0.4                                                     | 224.8 mmol g <sup>-1</sup> h <sup>-1</sup>                | [8]       |
| Mo-TiO <sub>2</sub>                                                        | 0.1 M KOH   | 86@0.68                                                    | 395.3 mmol g <sub>cat</sub> <sup>-1</sup> h <sup>-1</sup> | [9]       |
| HNCS                                                                       | 0.1 M KOH   | ~91.9                                                      | 618.5 mmol g <sub>cat</sub> <sup>-1</sup> h <sup>-1</sup> | [10]      |
| g-N-CNHS                                                                   | 0.1 M KOH   | 0.71                                                       | 73 mmol g <sup>-1</sup> h <sup>-1</sup> cm <sup>-2</sup>  | [11]      |

**Table S4.** Compare the ORR activity of **Co/NiO@NCNTs** with other electrocatalysts.

| Catalysts                               | Electron transfer number | Half-wave potential ( $E_{1/2}$ , V) | Current density ( $\text{mA}\cdot\text{cm}^{-2}$ ) | Tafel slope ( $\text{mV}\cdot\text{dec}^{-1}$ ) | Refs      |
|-----------------------------------------|--------------------------|--------------------------------------|----------------------------------------------------|-------------------------------------------------|-----------|
| Co/NiO@NCNTs                            | 3.8                      | 0.83                                 | 6.21                                               | 43                                              | This work |
| FexN-NC                                 | $\approx 4$              | 0.873                                | 5.7                                                | 90                                              | [12]      |
| Co-NCNTs/CNF                            | $\approx 3$              | 0.79                                 | NA                                                 | 67.33                                           | [13]      |
| Co <sub>5A</sub> Ni-NCNT/CNF            | $\approx 4$              | 0.86                                 | NA                                                 | 58                                              | [13]      |
| Co@Co <sub>3</sub> O <sub>4</sub> /NCNT | 3.8                      | 0.76                                 | NA                                                 | 83                                              | [14]      |
| NiFeVS                                  | 3.8                      | 0.759                                | NA                                                 | 82.5                                            | [15]      |
| 30-ZnMn-NC                              | 3.8                      | 0.83                                 | NA                                                 | 80.9                                            | [16]      |
| ZIF-Co <sub>3</sub> O <sub>4</sub> /NCF | 3.7                      | 0.813                                | NA                                                 | 72                                              | [17]      |

NA = not attained.

**Table S5.** Compare the performance of Zn-air battery based on **Co/NiO@NCNTs** with others.

| Catalysts                     | Power density<br>(mW cm <sup>-2</sup> ) | Specific capacity<br>(mA h g <sup>-1</sup> ) | Current density<br>(mA·cm <sup>-2</sup> ) | Refs      |
|-------------------------------|-----------------------------------------|----------------------------------------------|-------------------------------------------|-----------|
| Co/NiO@NCNTs                  | 73.8                                    | 779.3                                        | 5                                         | This work |
| Co <sub>5</sub> A Ni-NCNT/CNF | 70.39                                   | 803.5                                        | 10                                        | [13]      |
| MCO/CNFs@NC                   | 75                                      | 742                                          | 5                                         | [18]      |
| NiO/CoN PINWs                 | 79.6                                    | 490                                          | 5                                         | [19]      |
| Ni-N4/GHSs/Fe-<br>N4          | NA                                      | 777.6                                        | 5                                         | [20]      |
| NiCo/NCNTs                    | 65                                      | NA                                           | NA                                        | [21]      |

NA = not attained.



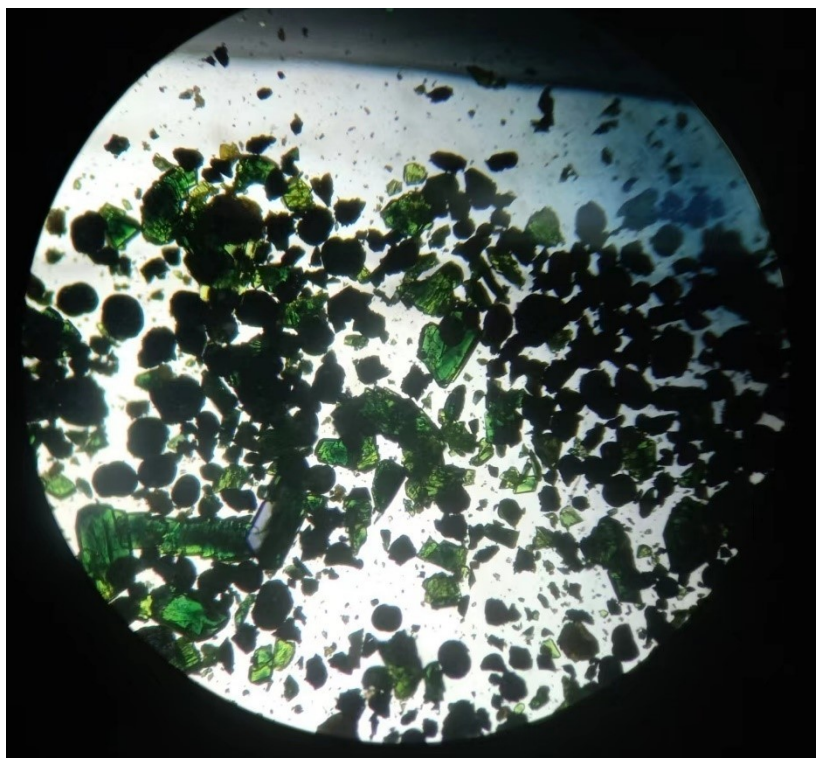

**Fig. S1.** Morphology of crystalline **NiMOF** under optical microscope.

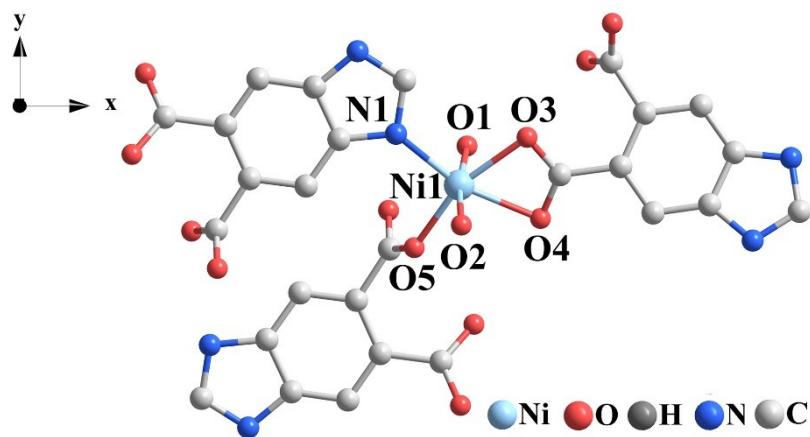

**Fig. S2.** The coordination environment of the Ni<sup>2+</sup>.

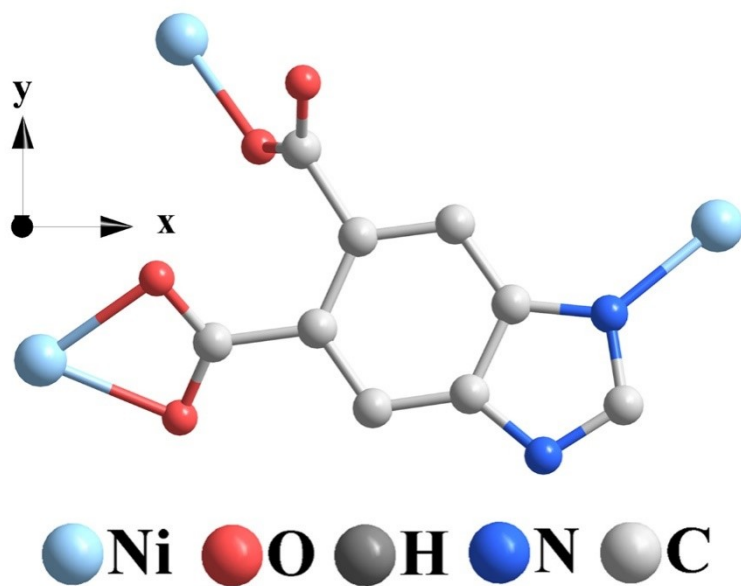

**Fig. S3.** The coordination environment of the BZIDA

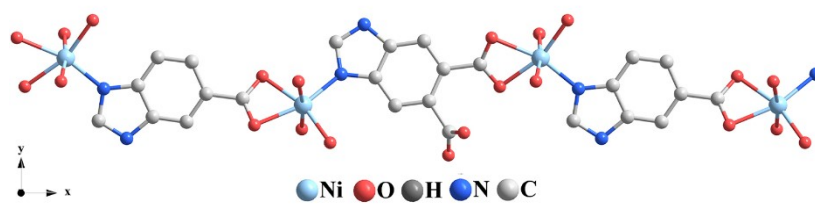

**Fig. S4.** One-dimensional chain-like structure of **NiMOF**.

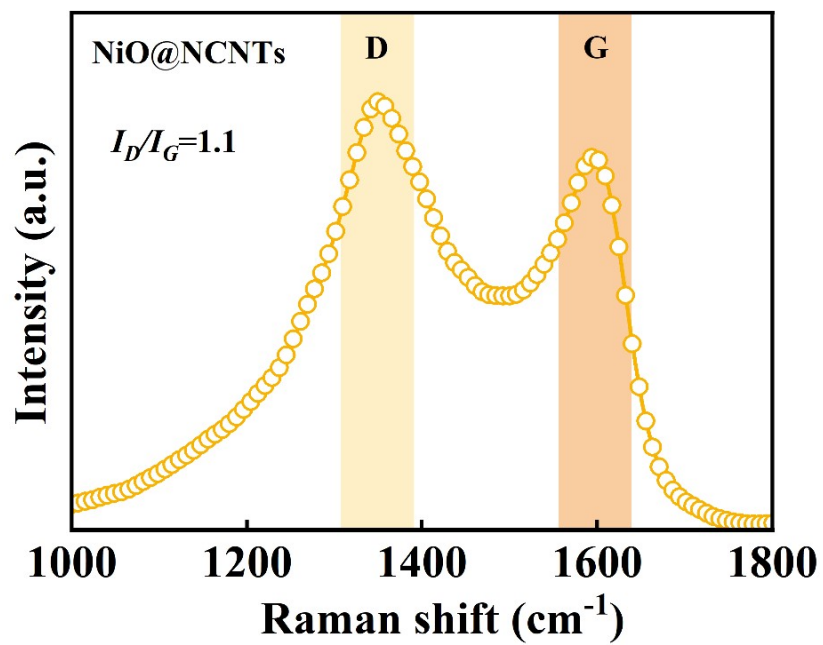

Fig. S5. Raman spectrum of NiO@NCNTs.

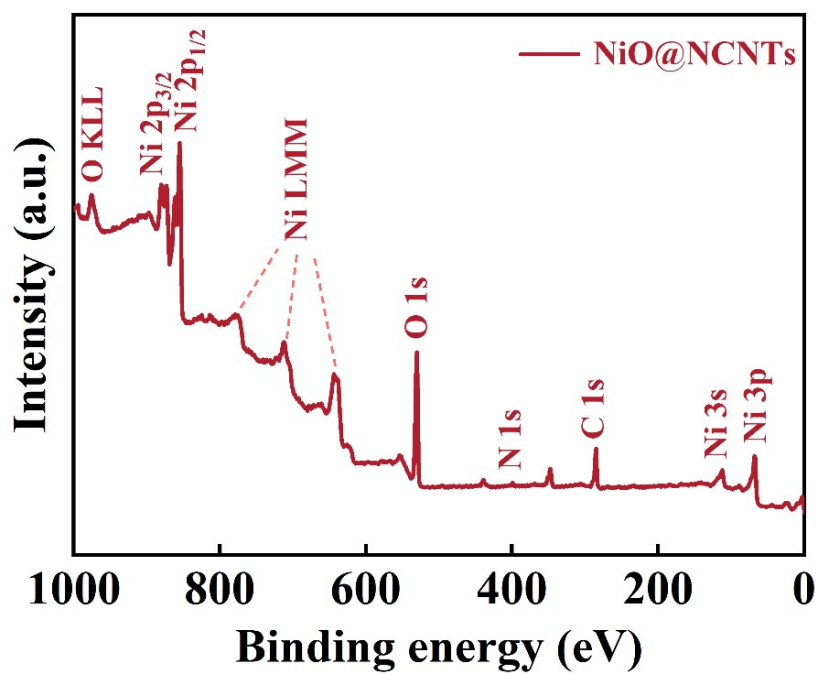

Fig. S6. XPS survey spectrum of NiO@NCNTs.

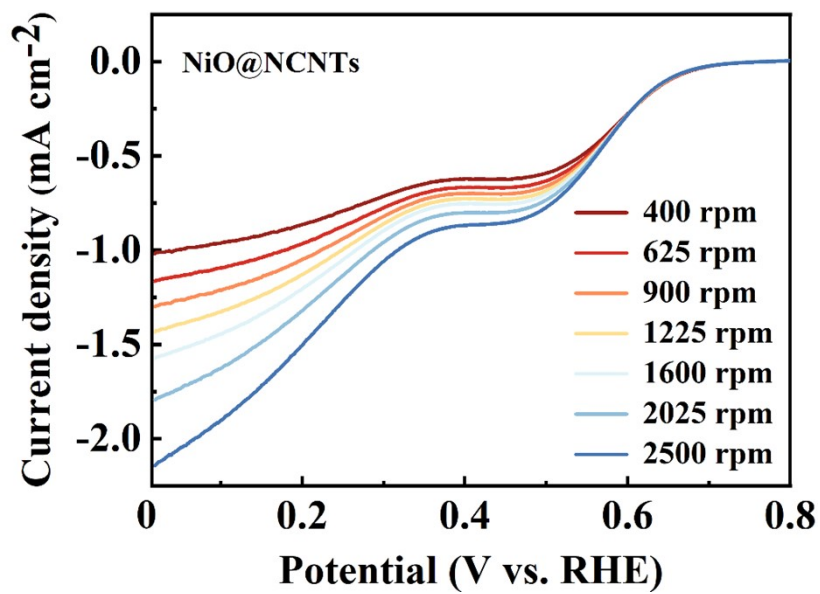

Fig. S7. LSV curves of NiO@NCNTs at different rotation speeds.

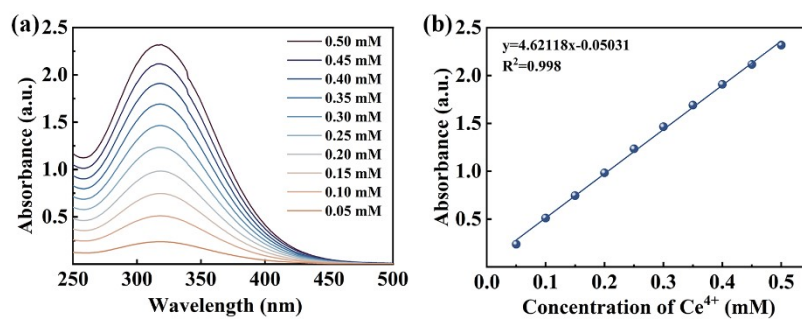

**Fig. S8.** (a) Absorbance spectra of standard  $\text{Ce}(\text{SO}_4)_2$  solutions in 0.5 M  $\text{H}_2\text{SO}_4$ ; (b) the calibration curve of  $\text{H}_2\text{O}_2$  concentration.



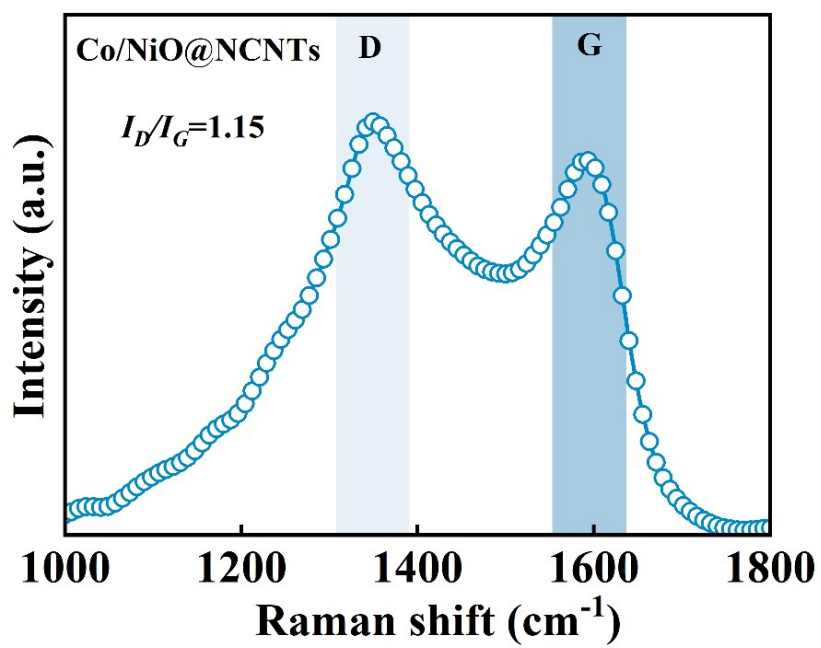

Fig. S9. Raman spectrum of Co/NiO@NCNTs.

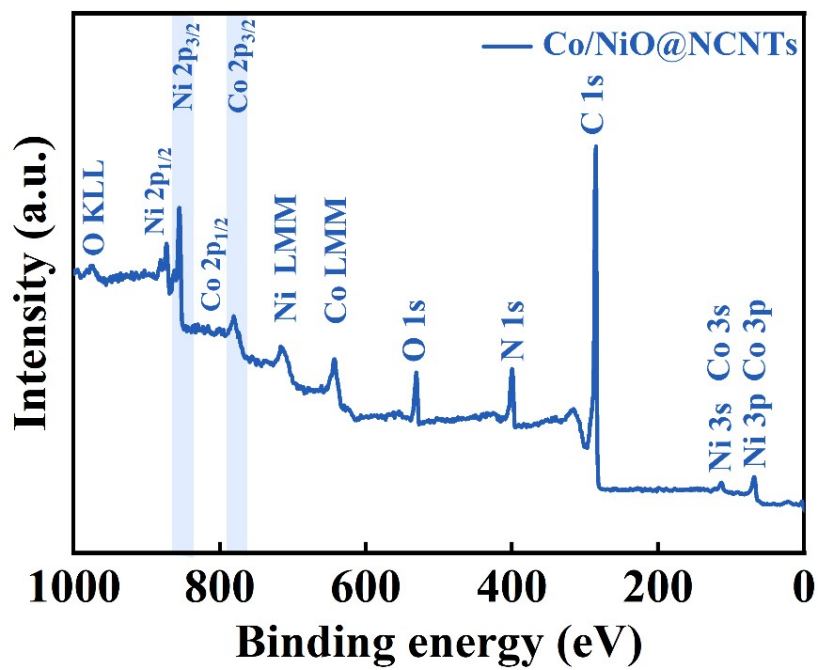

Fig. S10. XPS survey spectrum of Co/NiO@NCNTs.

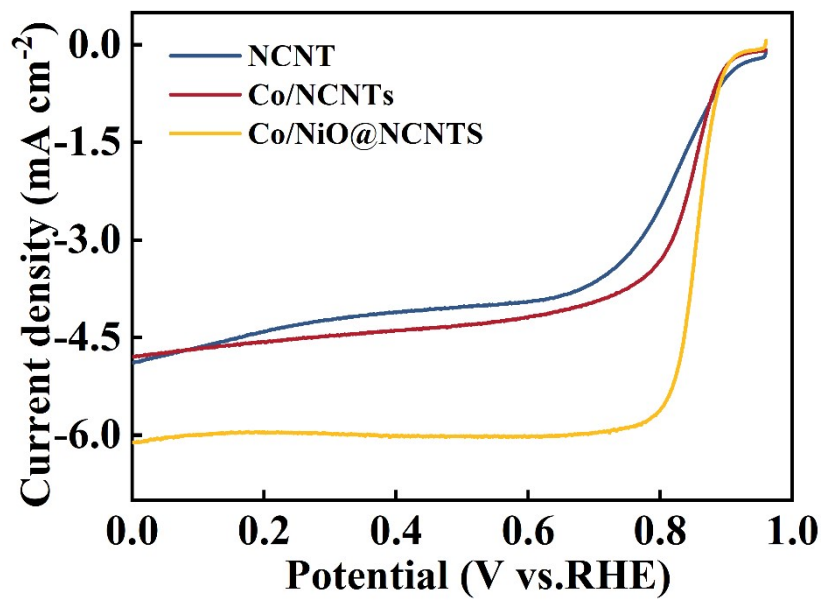

Fig. S11. LSV curves of NCNT, Co/NCNTs and Co/NiO@NCNTs at 1600 rpm.

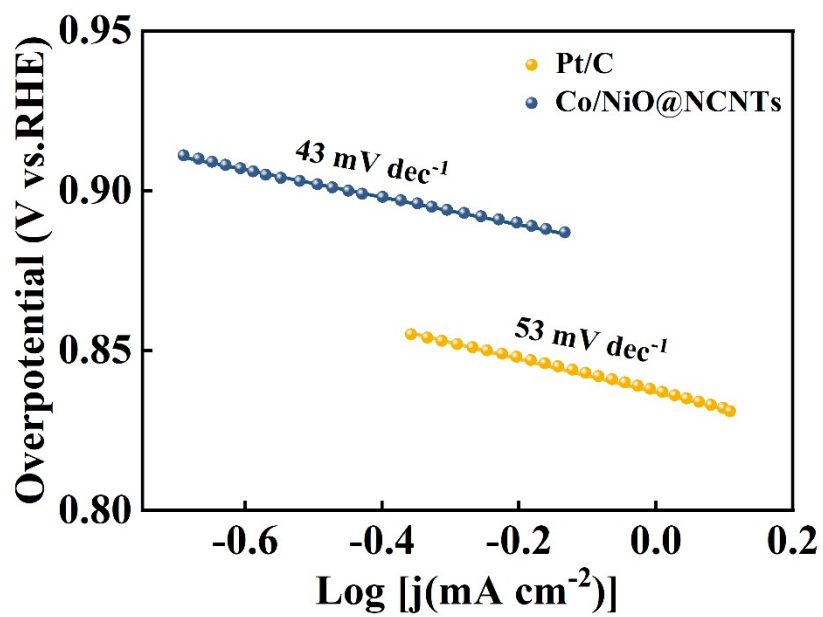

Fig. S12. Tafel plots of Co/NiO@NCNTs and Pt/C.

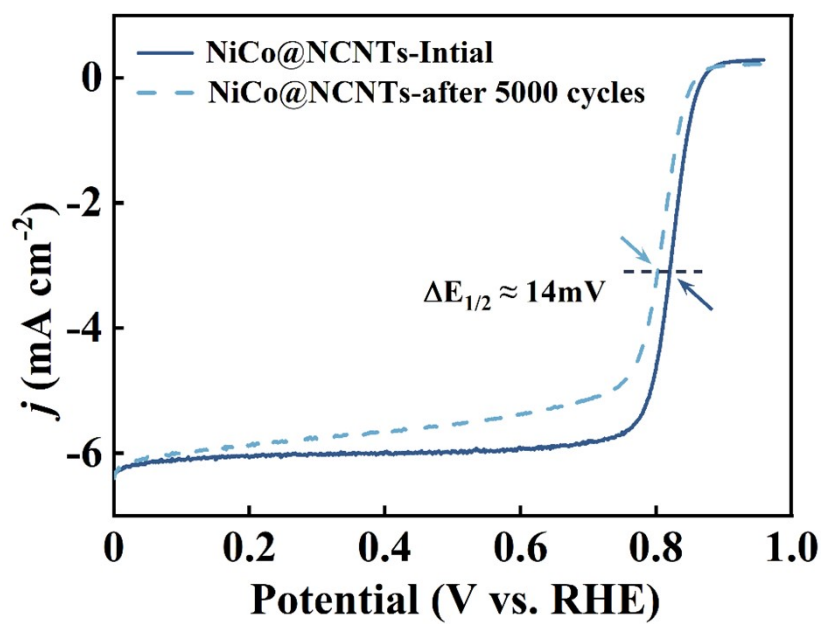

**Fig. S13.** ORR LSV curves in O<sub>2</sub> saturated 0.1 M KOH at 1600 rpm for the Co/NiO@NCNTs before and after 5000 CV cycles tests.

## Reference

1. B. You, N. Jiang, M. Sheng, W.S. Drisdell, J. Yano, Y. Sun, *ACS Catal.*, 2015, **5**, 7068-7076.
2. A.K. U, A. Sethi, R.M. Lawrence, V.M. Dhavale, *Int. J. Hydrogen Energy*, 2021, **46**, 34701-34712.
3. M. Wang, N. Zhang, Y. Feng, Z. Hu, Q. Shao, X. Huang, *Angew. Chem., Int. Ed.*, 2020, **59**, 14373-14377.
4. D. Xu, S. Wu, X. Xu, Q. Wang, *ACS Sustainable Chem. Eng.*, 2020, **8**, 4384-4391.
5. X. Ge, A. Sumboja, D. Wu, T. An, B. Li, F.W.T. Goh, T.S.A. Hor, Y. Zong, Z. Liu, *ACS Catal.* 2015, **5**, 4643-4667.
6. Y. Zhang, H. Jiang, C. Zhang, Y. Feng, H. Feng, S. Zhu, J. Hu, *J. Mater. Chem. A*, 2024, **12**, 6123-6133.
7. H. Jiang, Y. Wang, J. Hu, X. Shai, C. Zhang, T. Le, L. Zhang, M. Shao, *Chem. Eng. J.*, 2023, **452**, 139449.
8. L. Han, Y. Sun, S. Li, C. Cheng, C.E. Halbig, P. Feicht, J.L. Hübner, P. Strasser, S. Eigler, *ACS Catal.*, 2019, **9**, 1283-1288.
9. Z. Deng, C. Ma, S. Yan, J. Liang, K. Dong, T. Li, Y. Wang, L. Yue, Y. Luo, Q. Liu, Y. Liu, S. Gao, J. Du, X. Sun, *Catal. Sci. Technol.*, 2021, **11**, 6970-6974.
10. Y. Hu, J. Zhang, T. Shen, Z. Li, K. Chen, Y. Lu, J. Zhang, D. Wang, *ACS Appl. Mater. Interfaces*, 2021, **3**, 29551-29557.
11. D. Iglesias, A. Giuliani, M. Melchionna, S. Marchesan, A. Criado, L. Nasi, M. Bevilacqua, C. Tavagnacco, F. Vizza, M. Prato, P. Fornasiero, *Chem.*, 2018, **4**, 106-123.
12. S. Wu, X. Liu, H. Mao, J. Zhu, G. Zhou, J. Chi, Z. Wu and L. Wang, *Adv. Energy Mater.*, 2024, **14**, 2400183.
13. M. B. Poudel, M. P. Balanay, P. C. Lohani, K. Sekar and D. J. Yoo, *Adv. Energy Mater.*, 2024, 2400347.
14. J. Xiao, C. Chen, J. Xi, Y. Xu, F. Xiao, S. Wang and S. Yang, *Nanoscale*, 2015, **7**, 7056-7064.
15. F. N. I. Sari, Y.-C. Lai, Y.-J. Huang, X.-Y. Wei, H. Pourzolfaghar, Y.-H. Chang, M. Ghufuron, Y.-Y. Li, Y.-H. Su, O. Clemens and J.-M. Ting, *Adv. Funct. Mater.*, 2024, **34**, 2310181.
16. L. Wang, M. Xu, H. Li, Z. Huang, L. Wang, T. Taylor Isimjan and X. Yang, *Inorg. Chem*, 2023, **62**, 13284-13292.
17. L. Song, J. Tang, T. Wang, C. Wu, Y. Ide, J. He and Y. Yamauchi, *Chem. Eur. J.*, 2019, **25**, 6807-6813.
18. T. T. Gebremariam, F. Chen, Q. Wang, J. Wang, Y. Liu, X. Wang and A. Qaseem, *ACS Appl. Energy Mater.*, 2018, **1**, 1612-1625.
19. J. Yin, Y. Li, F. Lv, Q. Fan, Y.-Q. Zhao, Q. Zhang, W. Wang, F. Cheng, P. Xi and S. Guo, *ACS Nano*, 2017, **11**, 2275-2283.
20. J. Chen, H. Li, C. Fan, Q. Meng, Y. Tang, X. Qiu, G. Fu and T. Ma, *Adv. Mater.*, 2020, **32**, 003134.
21. S. Hanif, N. Iqbal, X. Shi, T. Noor, G. Ali and A. M. Kannan, *Renewable Energy*, 2020, **154**, 508-516.
